# Supplementary material
Source: PubMed Central journal article supplement (PMC4483586)
Supplement: ASN.2014050472_ASN2014050472SupplementaryData.pdf [file ASN.2014050472_ASN2014050472SupplementaryData.pdf]

## SUPPLEMENTAL MATERIAL

### SUPPLEMENTAL TABLES

**Table S1:** Patient characteristics of subjects included compared to those excluded, stratified by dialysis modality

|                                       | PD                |                |          | HD                 |                   |          | Missing           |
|---------------------------------------|-------------------|----------------|----------|--------------------|-------------------|----------|-------------------|
|                                       | Included          | Excluded       | <i>P</i> | Included           | Excluded          | <i>P</i> | Excluded          |
|                                       | <i>n</i> = 10,006 | <i>n</i> = 462 |          | <i>n</i> = 119,010 | <i>n</i> = 21,939 |          | <i>n</i> = 13,312 |
| Age (yr)                              | 56 ± 15           | 34 ± 26        | <0.001   | 62 ± 16            | 61 ± 16           | <0.001   | 62 ± 16           |
| Sex (% female)                        | 47                | 50             | 0.22     | 45                 | 43                | <0.001   | 44                |
| Diabetes mellitus (%)                 | 49                | 28             | <0.001   | 58                 | 52                | <0.001   | 53                |
| <b>Race/ethnicity (%)</b>             |                   |                |          |                    |                   |          |                   |
| Asian                                 | 5                 | 4              | 0.11     | 3                  | 3                 | 0.15     | 3                 |
| Black                                 | 21                | 16             | 0.009    | 33                 | 29                | <0.001   | 23                |
| Hispanic                              | 13                | 25             | <0.001   | 15                 | 8                 | <0.001   | 13                |
| White                                 | 54                | 50             | 0.08     | 43                 | 52                | <0.001   | 56                |
| Other                                 | 6                 | 5              | 0.66     | 7                  | 7                 | 0.10     | 6                 |
| <b>Vintage (time on dialysis,%):</b>  |                   |                |          |                    |                   |          |                   |
| 0-6 months                            | 62                | 62             | 0.95     | 57                 | 30                | <0.001   | 4                 |
| 6-24 months                           | 18                | 14             | 0.07     | 17                 | 29                | <0.001   | 0                 |
| 2-5 years                             | 14                | 11             | 0.04     | 16                 | 24                | <0.001   | 0                 |
| >5 years                              | 7                 | 4              | 0.007    | 10                 | 14                | <0.001   | 0                 |
| <b>Marital status (%)</b>             |                   |                |          |                    |                   |          |                   |
| Married                               | 61                | 29             | <0.001   | 47                 | 55                | <0.001   | .                 |
| Single                                | 23                | 60             | <0.001   | 28                 | 26                | <0.001   | .                 |
| Widowed                               | 8                 | 6              | 0.31     | 16                 | 13                | <0.001   | .                 |
| Divorced                              | 8                 | 4              | 0.004    | 8                  | 7                 | <0.001   | .                 |
| <b>Comorbid conditions (%)</b>        |                   |                |          |                    |                   |          |                   |
| Atherosclerotic heart disease         | 16                | 10             | 0.0002   | 21                 | 23                | <0.001   | 24                |
| Congestive heart failure              | 18                | 14             | 0.04     | 28                 | 26                | <0.001   | 33                |
| Other cardiac diseases                | 4                 | 5              | 0.52     | 6                  | 6                 | 0.04     | 10                |
| Cerebrovascular disease               | 5                 | 5              | 0.96     | 8                  | 7                 | 0.0009   | 9                 |
| Peripheral vascular disease           | 8                 | 6              | 0.07     | 12                 | 11                | 0.005    | 14                |
| Chronic obstructive pulmonary disease | 4                 | 2              | 0.08     | 6                  | 6                 | 0.24     | 8                 |
| Cancer                                | 4                 | 3              | 0.31     | 4                  | 6                 | <0.001   | 7                 |
| Current smoker                        | 5                 | 3              | 0.01     | 5                  | 4                 | <0.001   | 5                 |

Data are presented as mean ± SD, median (interquartile range), or percentage.

**Table S2A: Baseline characteristics by category of serum albumin-corrected calcium in patients undergoing PD.**

|                                               | Albumin-corrected serum calcium category mg/dl (n) |                 |                    |                      |                       |                 |
|-----------------------------------------------|----------------------------------------------------|-----------------|--------------------|----------------------|-----------------------|-----------------|
|                                               | Total (n =10,066)                                  | < 8.5 (332)     | 8.5 < to 8.9 (917) | 9.0 < to 9.4 (2,810) | 9.5 < to 10.1 (4,610) | ≥10.2 (1,397)   |
| Age (yr)                                      | 56 ± 15                                            | 48 ± 15         | 53 ± 16            | 56 ± 16              | 56 ± 15               | 57 ± 15         |
| Sex (% female)                                | 47                                                 | 38              | 35                 | 40                   | 50                    | 59              |
| Diabetes mellitus (%)                         | 49                                                 | 44              | 47                 | 51                   | 49                    | 42              |
| Body mass index (kg/m <sup>2</sup> )          | 26.6 ± 3.9                                         | 26.8 ± 3.7      | 26.6 ± 3.7         | 26.6 ± 4.2           | 26.6 ± 4.0            | 26.4 ± 3.1      |
| <b>Race/ethnicity (%)</b>                     |                                                    |                 |                    |                      |                       |                 |
| White                                         | 54                                                 | 41              | 45                 | 54                   | 56                    | 56              |
| Black*                                        | 21                                                 | 33              | 23                 | 18                   | 21                    | 56              |
| Hispanic                                      | 13                                                 | 16              | 17                 | 15                   | 13                    | 9               |
| Asian                                         | 5                                                  | 3               | 7                  | 5                    | 4                     | 4               |
| Other                                         | 6                                                  | 7               | 8                  | 5                    | 5                     | 5               |
| <b>Vintage (time on dialysis,%):</b>          |                                                    |                 |                    |                      |                       |                 |
| 0-6 months                                    | 62                                                 | 57              | 69                 | 71                   | 61                    | 40              |
| 6-24 months                                   | 18                                                 | 13              | 17                 | 16                   | 18                    | 21              |
| 2-5 years                                     | 14                                                 | 17              | 9                  | 10                   | 14                    | 25              |
| >5 years                                      | 7                                                  | 13              | 5                  | 4                    | 6                     | 15              |
| <b>Marital status (%)</b>                     |                                                    |                 |                    |                      |                       |                 |
| Married                                       | 59                                                 | 49              | 56                 | 60                   | 59                    | 61              |
| Single                                        | 24                                                 | 38              | 27                 | 24                   | 23                    | 22              |
| Widowed                                       | 9                                                  | 5               | 8                  | 8                    | 11                    | 9               |
| Divorced                                      | 8                                                  | 8               | 9                  | 8                    | 8                     | 8               |
| <b>Comorbid conditions (%)</b>                |                                                    |                 |                    |                      |                       |                 |
| Atherosclerotic heart disease                 | 16                                                 | 12              | 12                 | 17                   | 17                    | 16              |
| Congestive heart failure*                     | 18                                                 | 16              | 17                 | 19                   | 18                    | 16              |
| Other cardiac diseases*                       | 5                                                  | 3               | 5                  | 5                    | 5                     | 3               |
| Cerebrovascular disease*                      | 5                                                  | 4               | 4                  | 5                    | 5                     | 5               |
| Peripheral vascular disease*                  | 9                                                  | 7               | 7                  | 9                    | 9                     | 8               |
| Chronic obstructive pulmonary disease*        | 4                                                  | 4               | 3                  | 4                    | 4                     | 3               |
| Cancer*                                       | 4                                                  | 5               | 4                  | 4                    | 4                     | 4               |
| Current smoker                                | 5                                                  | 8               | 5                  | 5                    | 5                     | 5               |
| <b>Laboratory data</b>                        |                                                    |                 |                    |                      |                       |                 |
| Serum albumin (g/dl)                          | 3.5 ± 0.5                                          | 3.6 ± 0.5       | 3.6 ± 0.4          | 3.6 ± 0.4            | 3.5 ± 0.4             | 3.5 ± 0.5       |
| Serum creatinine (mg/dl)*                     | 9.0 ± 3.6                                          | 10.6 ± 4.3      | 9.5 ± 3.6          | 8.5 ± 3.6            | 8.9 ± 3.5             | 9.5 ± 3.6       |
| Blood hemoglobin (g/dl)                       | 12.0 ± 1.1                                         | 11.4 ± 1.3      | 11.8 ± 1.1         | 12.0 ± 1.1           | 12.1 ± 1.0            | 12.0 ± 1.1      |
| Serum ferritin (ng/ml)                        | 320 (175, 549)                                     | 297 (160, 549)  | 307 (163, 528)     | 302 (166, 532)       | 324 (180,549)         | 363 (181, 596)  |
| Serum total iron binding capacity (mg/dl)     | 235 ± 45                                           | 225 ± 47        | 233 ± 44           | 236 ± 45             | 237 ± 45              | 231 ± 47        |
| Serum phosphorus (mg/dl)                      | 5.4 ± 1.2                                          | 6.1 ± 1.5       | 5.8 ± 1.4          | 5.4 ± 1.2            | 5.3 ± 1.1             | 5.4 ± 1.2       |
| Serum bicarbonate (mg/dl)                     | 25 ± 3                                             | 24 ± 3          | 24 ± 3             | 25 ± 3               | 25 ± 3                | 28 ± 3          |
| Serum parathyroid hormone (pg/ml)             | 346 (205, 469)                                     | 405 (347, 734)  | 368 (280, 611)     | 332 (213, 444)       | 312 (187, 429)        | 368 (190, 529)  |
| Serum alkaline phosphatase (U/L)              | 102 (80.3, 133)                                    | 110 (83.7, 155) | 106 (81.5, 139)    | 98.4 (78.7, 129)     | 101 (80.0, 131)       | 107 (83.3, 142) |
| White blood cell count (x10 <sup>3</sup> /µl) | 7.8 ± 2.4                                          | 7.3 ± 2.7       | 7.4 ± 2.3          | 7.6 ± 2.2            | 7.9 ± 2.3             | 8.3 ± 2.5       |
| Percent lymphocyte                            | 19 ± 6                                             | 19 ± 7          | 19 ± 6             | 19 ± 6               | 19 ± 6                | 19 ± 6          |

Data are presented as mean ± SD, median (interquartile range), or percentage. \**P*-value for difference among categories ≥0.05, all other *P*-values are <0.05.

**Table S2B:** Baseline characteristics by category of serum albumin-corrected calcium in patients undergoing HD.

|                                               | Albumin-corrected serum calcium category mg/dl (n) |                |                       |                       |                |                |
|-----------------------------------------------|----------------------------------------------------|----------------|-----------------------|-----------------------|----------------|----------------|
|                                               | Total (n =118,718)                                 | < 8.5 (4,521)  | 8.5 < to 8.9 (14,286) | 9.0 < to 9.4 (40,351) | 9.5 < to 10.1  | ≥10.2 (11,696) |
| Age (yr)                                      | 62 ± 16                                            | 54 ± 16        | 60 ± 16               | 62 ± 15               | 62 ± 15        | 63 ± 15        |
| Sex (% female)                                | 45                                                 | 37             | 36                    | 41                    | 50             | 55             |
| Diabetes mellitus (%)                         | 58                                                 | 50             | 60                    | 61                    | 57             | 49             |
| Body mass index (kg/m <sup>2</sup> )          | 26.6 ± 6.56                                        | 26.8 ± 6.93    | 26.5 ± 6.48           | 26.5 ± 6.43           | 26.8 ± 6.68    | 25.9 ± 6.40    |
| <b>Race/ethnicity (%)</b>                     |                                                    |                |                       |                       |                |                |
| White                                         | 43                                                 | 33             | 41                    | 44                    | 43             | 41             |
| Black                                         | 33                                                 | 36             | 27                    | 28                    | 36             | 41             |
| Hispanic                                      | 15                                                 | 18             | 20                    | 18                    | 12             | 9              |
| Asian                                         | 3                                                  | 3              | 4                     | 3                     | 3              | 2              |
| Other                                         | 7                                                  | 9              | 8                     | 7                     | 6              | 6              |
| <b>Vintage (time on dialysis,%):</b>          |                                                    |                |                       |                       |                |                |
| 0-6 months                                    | 57                                                 | 47             | 60                    | 63                    | 57             | 39             |
| 6-24 months                                   | 16                                                 | 17             | 18                    | 17                    | 16             | 15             |
| 2-5 years                                     | 16                                                 | 18             | 14                    | 14                    | 17             | 24             |
| >5 years                                      | 10                                                 | 18             | 8                     | 6                     | 10             | 22             |
| <b>Marital status (%)</b>                     |                                                    |                |                       |                       |                |                |
| Married*                                      | 47                                                 | 41             | 48                    | 49                    | 47             | 46             |
| Single                                        | 28                                                 | 39             | 30                    | 27                    | 28             | 27             |
| Widowed                                       | 16                                                 | 11             | 14                    | 16                    | 17             | 18             |
| Divorced*                                     | 8                                                  | 9              | 8                     | 8                     | 8              | 8              |
| <b>Comorbid conditions (%)</b>                |                                                    |                |                       |                       |                |                |
| Atherosclerotic heart disease                 | 21                                                 | 15             | 20                    | 23                    | 21             | 20             |
| Congestive heart failure*                     | 28                                                 | 23             | 27                    | 29                    | 28             | 26             |
| Other cardiac diseases*                       | 6                                                  | 5              | 5                     | 6                     | 6              | 5              |
| Cerebrovascular disease                       | 8                                                  | 5              | 7                     | 8                     | 8              | 8              |
| Peripheral vascular disease                   | 11                                                 | 9              | 11                    | 12                    | 11             | 10             |
| Chronic obstructive pulmonary disease*        | 6                                                  | 4              | 6                     | 6                     | 6              | 5              |
| Cancer                                        | 4                                                  | 4              | 4                     | 4                     | 4              | 5              |
| Current smoker                                | 5                                                  | 6              | 5                     | 5                     | 5              | 4              |
| <b>Laboratory data</b>                        |                                                    |                |                       |                       |                |                |
| Serum albumin (g/dl)                          | 3.7 ± 0.4                                          | 3.8 ± 0.4      | 3.7 ± 0.4             | 3.7 ± 0.4             | 3.7 ± 0.5      | 3.6 ± 0.5      |
| Serum creatinine (mg/dl)                      | 8.1 ± 3.0                                          | 9.7 ± 3.3      | 8.3 ± 3.0             | 7.8 ± 2.9             | 8.1 ± 3.0      | 8.3 ± 2.9      |
| Blood hemoglobin (g/dl)                       | 12.0 ± 1.0                                         | 11.8 ± 1.1     | 11.9 ± 1.0            | 12.0 ± 0.9            | 12.0 ± 0.9     | 11.8 ± 1.1     |
| Serum ferritin (ng/ml)                        | 506 (306, 721)                                     | 462 (269, 673) | 453 (264, 662)        | 482 (293, 691)        | 526 (324, 738) | 575 (366,839)  |
| Serum total iron binding capacity (mg/dl)     | 204 ± 40                                           | 204 ± 41       | 206 ± 40              | 206 ± 40              | 204 ± 40       | 193 ± 42       |
| Serum phosphorus (mg/dl)                      | 5.5 ± 1.3                                          | 6.5 ± 1.8      | 5.8 ± 1.4             | 5.5 ± 1.2             | 5.4 ± 1.2      | 5.5 ± 1.2      |
| Serum bicarbonate (mg/dl)                     | 23 ± 3                                             | 21 ± 3         | 22 ± 3                | 23 ± 3                | 23 ± 3         | 23 ± 3         |
| Serum parathyroid hormone (pg/ml)             | 300 (193, 386)                                     | 368 (226, 538) | 309 (207, 403)        | 274 (188, 368)        | 295 (188, 376) | 368 (224, 551) |
| Serum alkaline phosphatase (U/L)              | 107 (57)                                           | 109 (63)       | 106 (57)              | 105 (54)              | 106 (56)       | 115 (68)       |
| White blood cell count (x10 <sup>3</sup> /μl) | 7.5 ± 2.4                                          | 7.2 ± 2.4      | 7.3 ± 2.4             | 7.4 ± 2.3             | 7.6 ± 2.4      | 7.8 ± 2.7      |
| Percent lymphocyte                            | 20 ± 7.2                                           | 20.0 ± 7.2     | 20 ± 7                | 20 ± 7                | 20 ± 7         | 20 ± 7         |

Data are presented as mean ± SD, median (interquartile range), or percentage. \**P*-value for difference among categories ≥0.05, all other *P*-values are <0.05.

**Table S3A: Characteristics by baseline serum phosphorus category in patients undergoing PD.**

|                                                | Serum phosphorus category mg/dl (n) |                 |                      |                      |                 |
|------------------------------------------------|-------------------------------------|-----------------|----------------------|----------------------|-----------------|
|                                                | Total (n = 10,064 )                 | ≤ 4.5 (2,849)   | 4.5 < to 5.4 (2,587) | 5.4 < to 6.4 (2,494) | > 6.4 (2,134)   |
| Age (yr)                                       | 56 ± 15                             | 62 ± 15         | 57 ± 15              | 53 ± 14              | 47 ± 14         |
| Sex (% female)                                 | 47                                  | 47              | 48                   | 48                   | 44              |
| Diabetes mellitus (%)                          | 49                                  | 51              | 49                   | 49                   | 42              |
| Body mass index (kg/m <sup>2</sup> )           | 26.6 ± 6.0                          | 26.1 ± 5.9      | 26.6 ± 5.8           | 27.8 ± 6.2           | 27.3 ± 6.4      |
| <b>Race/ethnicity (%)</b>                      |                                     |                 |                      |                      |                 |
| White                                          | 54                                  | 56              | 55                   | 54                   | 52              |
| Black*                                         | 21                                  | 21              | 21                   | 22                   | 22              |
| Hispanic                                       | 13                                  | 13              | 12                   | 14                   | 14              |
| Asian*                                         | 5                                   | 5               | 7                    | 5                    | 4               |
| Other                                          | 6                                   | 5               | 6                    | 6                    | 7               |
| <b>Vintage (time on dialysis,%):</b>           |                                     |                 |                      |                      |                 |
| 0-6 months                                     | 62                                  | 66              | 65                   | 59                   | 50              |
| 6-24 months                                    | 18                                  | 16              | 16                   | 17                   | 22              |
| 2-5 years                                      | 14                                  | 12              | 13                   | 16                   | 19              |
| >5 years                                       | 7                                   | 6               | 5                    | 7                    | 9               |
| <b>Marital status (%)</b>                      |                                     |                 |                      |                      |                 |
| Married                                        | 62                                  | 63              | 62                   | 62                   | 56              |
| Single                                         | 23                                  | 19              | 22                   | 22                   | 32              |
| Widowed                                        | 8                                   | 6               | 8                    | 7                    | 4               |
| Divorced                                       | 8                                   | 12              | 8                    | 8                    | 9               |
| <b>Comorbid conditions (%)</b>                 |                                     |                 |                      |                      |                 |
| Atherosclerotic heart disease                  | 16                                  | 22              | 17                   | 14                   | 11              |
| Congestive heart failure                       | 18                                  | 21              | 18                   | 16                   | 14              |
| Other cardiac diseases                         | 4                                   | 7               | 4                    | 4                    | 3               |
| Cerebrovascular disease                        | 5                                   | 7               | 5                    | 5                    | 3               |
| Peripheral vascular disease                    | 8                                   | 11              | 9                    | 8                    | 6               |
| Chronic obstructive pulmonary disease          | 4                                   | 5               | 3                    | 4                    | 5               |
| Cancer                                         | 4                                   | 5               | 3                    | 4                    | 2               |
| Current smoker                                 | 5                                   | 4               | 5                    | 5                    | 6               |
| <b>Laboratory data</b>                         |                                     |                 |                      |                      |                 |
| Serum albumin (g/dl)                           | 3.5 ± 0.5                           | 3.4 ± 0.5       | 3.6 ± 0.5            | 3.6 ± 0.4            | 3.7 ± 0.5       |
| Serum creatinine (mg/dl)                       | 9.0 ± 3.6                           | 6.6 ± 2.8       | 8.4 ± 2.9            | 9.8 ± 3.5            | 11.8 ± 3.5      |
| Blood hemoglobin (g/dl)                        | 12.0 ± 1.0                          | 12.2 ± 1.1      | 12.3 ± 1.4           | 12.0 ± 1.0           | 11.7 ± 1.2      |
| Serum ferritin (ng/ml)                         | 311 (171, 536)                      | 309 (169, 550)  | 312 (175, 537)       | 315 (176, 534)       | 306 (165, 522)  |
| Serum total iron binding capacity (mg/dl)      | 236 ± 45                            | 233 ± 48        | 237 ± 45             | 238 ± 43             | 233 ± 44        |
| Serum calcium (uncorrected; mg/dl)*            | 9.2 ± 0.8                           | 9.2 ± 0.7       | 9.2 ± 0.8            | 9.3 ± 0.65           | 9.2 ± 0.73      |
| Serum phosphorus (mg/dl)*                      | 5.4 ± 1.2                           | 3.9 ± 0.5       | 5.0 ± 0.2            | 5.9 ± 0.3            | 7.2 ± 0.9       |
| Serum bicarbonate (mg/dl)*                     | 24.9 ± 3.2                          | 26.1 ± 2.4      | 25.1 ± 2.9           | 24.3 ± 2.9           | 22.9 ± 3.1      |
| Serum parathyroid hormone (pg/ml)              | 303 (188, 515)                      | 234 (147, 360)  | 283 (182, 448)       | 340 (219, 548)       | 459 (263, 780)  |
| Serum alkaline phosphatase (U/L)*              | 102 (80.2, 133)                     | 104 (83.0, 136) | 101 (80.2, 131)      | 102 (78.8, 132)      | 100 (78.7, 134) |
| White blood cell count (x10 <sup>3</sup> /μl)* | 7.8 ± 2.4                           | 7.8 ± 2.6       | 7.8 ± 2.4            | 7.8 ± 2.4            | 7.8 ± 2.4       |
| Percent lymphocyte                             | 18.8 ± 6.79                         | 18.9 ± 7.12     | 18.9 ± 6.79          | 18.9 ± 6.63          | 18.4 ± 6.6      |

Data are presented as mean ± SD, median (interquartile range), or percentage. \**P*-value for difference among categories ≥ 0.05, all other *P*-values are < 0.05.

**Table S3B: Characteristics by baseline serum phosphorus category in patients undergoing HD.**

|                                               | Serum phosphorus category mg/dl (n) |                 |                       |                       |                 |
|-----------------------------------------------|-------------------------------------|-----------------|-----------------------|-----------------------|-----------------|
|                                               | Total (n =118,978)                  | < 4.5 (29,502)  | 4.5 < to 5.4 (29,583) | 5.4 < to 6.4 (29,774) | ≥6.4 (30,119)   |
| Age (yr)                                      | 62 ± 16                             | 68 ± 14         | 65 ± 14               | 60 ± 15               | 53 ± 15         |
| Sex (% female)                                | 45                                  | 46              | 48                    | 46                    | 42              |
| Diabetes mellitus (%)                         | 58                                  | 58              | 61                    | 60                    | 52              |
| Body mass index (kg/m <sup>2</sup> )          | 26.6 ± 6.0                          | 27.3 ± 6.4      | 26.3 ± 5.3            | 27.8 ± 6.2            | 27.3 ± 6.4      |
| <b>Race/ethnicity (%)</b>                     |                                     |                 |                       |                       |                 |
| White                                         | 42                                  | 47              | 44                    | 41                    | 39              |
| Black                                         | 33                                  | 31              | 31                    | 34                    | 34              |
| Hispanic                                      | 15                                  | 14              | 15                    | 16                    | 16              |
| Asian*                                        | 3                                   | 3               | 3                     | 3                     | 3               |
| Other                                         | 7                                   | 6               | 6                     | 7                     | 8               |
| <b>Vintage (time on dialysis,%):</b>          |                                     |                 |                       |                       |                 |
| 0-6 months                                    | 57                                  | 64              | 61                    | 56                    | 47              |
| 6-24 months                                   | 17                                  | 15              | 16                    | 17                    | 19              |
| 2-5 years                                     | 16                                  | 13              | 15                    | 17                    | 21              |
| >5 years                                      | 10                                  | 8               | 8                     | 10                    | 14              |
| <b>Marital status (%)</b>                     |                                     |                 |                       |                       |                 |
| Married                                       | 47                                  | 49              | 49                    | 48                    | 44              |
| Single                                        | 28                                  | 23              | 26                    | 28                    | 36              |
| Widowed                                       | 16                                  | 21              | 17                    | 15                    | 11              |
| Divorced                                      | 8                                   | 7               | 8                     | 9                     | 10              |
| <b>Comorbid conditions (%)</b>                |                                     |                 |                       |                       |                 |
| Atherosclerotic heart disease                 | 21                                  | 26              | 23                    | 20                    | 15              |
| Congestive heart failure                      | 28                                  | 32              | 29                    | 27                    | 23              |
| Other cardiac diseases                        | 6                                   | 8               | 6                     | 5                     | 4               |
| Cerebrovascular disease                       | 7                                   | 10              | 8                     | 7                     | 5               |
| Peripheral vascular disease                   | 11                                  | 14              | 12                    | 11                    | 9               |
| Chronic obstructive pulmonary disease         | 6                                   | 7               | 6                     | 5                     | 4               |
| Cancer                                        | 4                                   | 6               | 5                     | 4                     | 3               |
| Current smoker                                | 5                                   | 4               | 4                     | 5                     | 7               |
| <b>Laboratory data</b>                        |                                     |                 |                       |                       |                 |
| Serum albumin (g/dl)                          | 3.7 ± 0.4                           | 3.6 ± 0.5       | 3.7 ± 0.4             | 3.7 ± 0.4             | 3.8 ± 0.4       |
| Serum creatinine (mg/dl)                      | 8.1 ± 3.0                           | 6.3 ± 2.6       | 7.5 ± 2.5             | 8.6 ± 2.6             | 10.0 ± 2.9      |
| Blood hemoglobin (g/dl)                       | 12.0 ± 1.0                          | 11.9 ± 1.1      | 12.0 ± 0.9            | 12.0 ± 0.9            | 11.9 ± 1.0      |
| Serum ferritin (ng/ml)*                       | 498 (302, 727)                      | 509 (308,760)   | 506 (309, 724)        | 495 (303, 717)        | 483 (288, 713)  |
| Serum total iron binding capacity (mg/dl)     | 204 ± 40                            | 198 ± 44        | 205 ± 40              | 207 ± 39              | 206 ± 38        |
| Serum calcium (uncorrected; mg/dl)            | 9.2 ± 0.6                           | 9.2 ± 0.6       | 9.3 ± 0.6             | 9.3 ± 0.6             | 9.2 ± 0.7       |
| Serum bicarbonate (mg/dl)                     | 23 ± 3                              | 24 ± 3          | 23 ± 2                | 22 ± 2                | 21 ± 3          |
| Serum parathyroid hormone (pg/ml)             | 267 (180, 420)                      | 203 (135, 289)  | 240 (170,340)         | 282 (198, 420)        | 402 (256, 672)  |
| Serum alkaline phosphatase (U/L)              | 107 (170,340)                       | 110 (86.5, 145) | 106 (84.5, 140)       | 105 (83.4, 139)       | 106 (83.2, 143) |
| White blood cell count (x10 <sup>3</sup> /µl) | 7.5 ± 2.4                           | 7.6 ± 2.7       | 7.4 ± 2.3             | 7.4 ± 2.2             | 7.5 ± 2.3       |
| Percent lymphocyte                            | 20.0 ± 7.2                          | 19.4 ± 7.4      | 20.1 ± 7.1            | 20.4 ± 7.1            | 20.2 ± 7.0      |

Data are presented as mean ± SD, median (interquartile range), or percent. \**P*-value for difference among categories ≥0.05, all other *P*-values are <0.05.

**Table S4:** Sensitivity analysis – Adjusted hazard ratios for association of categories of uncorrected albumin-corrected serum calcium with all-cause, cardiovascular, and infection-related mortality in patients treated with PD and HD, adjusted for additional laboratory covariates (PD, n = 10,066; HD, n = 118,955)

|                    | Uncorrected serum calcium (mg/dl) | All-cause mortality <sup>a</sup> | Cardio-vascular mortality <sup>a</sup> | Infection-related mortality <sup>a</sup> |
|--------------------|-----------------------------------|----------------------------------|----------------------------------------|------------------------------------------|
| <b>PD Patients</b> | <8.5                              | 1.20<br>(1.08, 1.34)             | 1.11<br>(0.94, 1.32)                   | 1.18<br>(0.93, 1.50)                     |
|                    | 8.5-<9.0                          | 1.07<br>(0.98, 1.17)             | 1.04<br>(0.92, 1.19)                   | 1.11<br>(0.92, 1.34)                     |
|                    | 9.0-<9.5                          | Reference                        | Reference                              | Reference                                |
|                    | 9.5-<10.2                         | 1.07<br>(0.98, 1.16)             | 0.99<br>(0.87, 1.13)                   | 1.10<br>(0.91, 1.32)                     |
|                    | ≥10.2                             | 1.61<br>(1.39, 1.87)             | 1.41<br>(1.15, 1.84)                   | 1.53<br>(1.10, 2.12)                     |
| <b>HD Patients</b> | <8.5                              | 1.10<br>(1.06, 1.13)             | 1.07<br>(1.02, 1.12)                   | 1.08<br>(1.01, 1.16)                     |
|                    | 8.5-<9.0                          | 1.09<br>(1.06, 1.11)             | 1.07<br>(1.04, 1.11)                   | 1.11<br>(1.05, 1.17)                     |
|                    | 9.0-<9.5                          | Reference                        | Reference                              | Reference                                |
|                    | 9.5-<10.2                         | 1.04<br>(1.02, 1.06)             | 1.07<br>(1.03, 1.10)                   | 1.02<br>(0.97, 1.08)                     |
|                    | ≥10.2                             | 1.58<br>(1.52, 1.64)             | 1.63<br>(1.54, 1.72)                   | 1.46<br>(1.34, 1.59)                     |

PD, peritoneal dialysis; HD, hemodialysis.

<sup>a</sup> Data adjusted for age, sex, diabetes, race and/or ethnicity, primary insurance, marital status, dialysis vintage category (<6 months, 6 months to 2 years, 2-5 years, and >5 years), body mass index, atherosclerotic heart disease, cancer, congestive heart failure, other cardiac diseases, cerebrovascular disease, peripheral vascular disease, chronic obstructive pulmonary disease, tobacco smoking, serum albumin, total iron binding capacity, serum creatinine, serum white blood cell count, serum lymphocyte percentage, body mass index, serum bicarbonate, serum phosphorus, and parathyroid hormone

**Table S5:** Sensitivity analysis - association of categories of time-averaged albumin-corrected serum calcium with all-cause, cardiovascular, and infection-related mortality in patients treated with PD and HD, adjustment for additional laboratory covariates (PD, n = 10,066; HD, n = 118,955)

|                    | Albumin-corrected serum calcium (mg/dl) | All-cause mortality <sup>a</sup> | Cardio-vascular mortality <sup>a</sup> | Infection-related mortality <sup>a</sup> |
|--------------------|-----------------------------------------|----------------------------------|----------------------------------------|------------------------------------------|
| <b>PD Patients</b> | <8.5                                    | 1.30<br>(1.07, 1.59)             | 1.10<br>(0.80, 1.50)                   | 1.34<br>(0.89, 2.02)                     |
|                    | 8.5-<9.0                                | 1.16<br>(1.02, 1.32)             | 1.05<br>(0.86, 1.28)                   | 1.06<br>(0.79, 1.42)                     |
|                    | 9.0-<9.5                                | Reference                        | Reference                              | Reference                                |
|                    | 9.5-<10.2                               | 0.95<br>(0.88, 1.02)             | 0.95<br>(0.84, 1.07)                   | 0.93<br>(0.78, 1.11)                     |
|                    | ≥10.2                                   | 1.21<br>(1.09, 1.34)             | 1.13<br>(0.97, 1.32)                   | 1.11<br>(0.89, 1.39)                     |
| <b>HD Patients</b> | <8.5                                    | 1.19<br>(1.14, 1.25)             | 1.14<br>(0.96, 1.23)                   | 1.18<br>(1.05, 1.32)                     |
|                    | 8.5-<9.0                                | 1.07<br>(1.04, 1.10)             | 1.07<br>(1.02, 1.11)                   | 1.06<br>(0.99, 1.13)                     |
|                    | 9.0-<9.5                                | Reference                        | Reference                              | Reference                                |
|                    | 9.5-<10.2                               | 0.99<br>(0.97, 1.01)             | 1.02<br>(0.99, 1.05)                   | 0.98<br>(0.94, 1.03)                     |
|                    | ≥10.2                                   | 1.29<br>(1.25, 1.32)             | 1.36<br>(1.30, 1.42)                   | 1.23<br>(1.15, 1.31)                     |

PD, peritoneal dialysis; HD, hemodialysis.

<sup>a</sup> Data adjusted for age, sex, diabetes, race and/or ethnicity, primary insurance, marital status, dialysis vintage category (<6 months, 6 months to 2 years, 2-5 years, and >5 years), body mass index, atherosclerotic heart disease, cancer, congestive heart failure, other cardiac diseases, cerebrovascular disease, peripheral vascular disease, chronic obstructive pulmonary disease, tobacco smoking, serum albumin, total iron binding capacity, serum creatinine, serum white blood cell count, serum lymphocyte percentage, body mass index, serum bicarbonate, serum phosphorus, and parathyroid hormone

**Table S6:** Sensitivity analysis - association of categories of time-averaged serum phosphorus with all-cause, cardiovascular, and infection-related mortality in patients treated with PD and HD, adjustment for additional laboratory covariates (PD, n = 10,066; HD, n = 118,955)

|                    | Serum phosphorus (mg/dl) | All-cause mortality <sup>a</sup> |  | Cardio-vascular mortality <sup>a</sup> |  | Infection-related mortality <sup>a</sup> |
|--------------------|--------------------------|----------------------------------|--|----------------------------------------|--|------------------------------------------|
| <b>PD Patients</b> | ≤ 4.5                    | 1.03<br>(0.94, 1.12)             |  | 1.00<br>(0.87, 1.15)                   |  | 0.96<br>(0.79, 1.16)                     |
|                    | 4.5 -5.4                 | Reference                        |  | Reference                              |  | Reference                                |
|                    | 5.4-6.4                  | 1.10<br>(1.01, 1.21)             |  | 1.21<br>(1.05, 1.40)                   |  | 0.92<br>(0.75, 1.12)                     |
|                    | ≥ 6.4                    | 1.49<br>(1.34, 1.65)             |  | 1.78<br>(1.52, 2.09)                   |  | 1.29<br>(1.03, 1.62)                     |
|                    |                          |                                  |  |                                        |  |                                          |
| <b>HD Patients</b> | ≤ 4.5                    | 1.06<br>(1.03, 1.08)             |  | 1.03<br>(0.99, 1.07)                   |  | 1.08<br>(1.02, 1.14)                     |
|                    | 4.5 -5.4                 | Reference                        |  | Reference                              |  | Reference                                |
|                    | 5.4-6.4                  | 1.13<br>(1.10, 1.16)             |  | 1.18<br>(1.14, 1.22)                   |  | 1.14<br>(1.08, 1.21)                     |
|                    | ≥ 6.4                    | 1.53<br>(1.49, 1.56)             |  | 1.70<br>(1.63, 1.76)                   |  | 1.54<br>(1.45, 1.63)                     |

PD, peritoneal dialysis; HD, hemodialysis.

<sup>a</sup> Data adjusted for age, sex, diabetes, race and/or ethnicity, primary insurance, marital status, dialysis vintage category (<6 months, 6 months to 2 years, 2-5 years, and >5 years), body mass index, atherosclerotic heart disease, cancer, congestive heart failure, other cardiac diseases, cerebrovascular disease, peripheral vascular disease, chronic obstructive pulmonary disease, tobacco smoking, serum albumin, total iron binding capacity, serum creatinine, serum white blood cell count, serum lymphocyte percentage, body mass index, serum bicarbonate, serum calcium, and parathyroid hormone
